# Supplementary material
Source: Royal Society of Chemistry journal article supplement (doi:10.1039/d6ay00617e)
Supplement: d6ay00617e1.pdf [file d6ay00617e1.pdf]

## Supporting Information

### Non-Enzymatic Electrochemical Detection of Hemoglobin via Analyte-Triggered In Situ Phase Transformation of $\beta$ -Ni(OH)<sub>2</sub> Nanosheets

Priya Pathmanathan <sup>a</sup>, Harshit Kale <sup>a</sup>, Shourya Singh Thakur <sup>a</sup>, Madhavan Ramasubramani <sup>b</sup>, A. Gomathi <sup>a\*</sup>

<sup>a</sup>-Department of Chemistry, Mahindra University, Hyderabad, India-500043.

<sup>b</sup>-Department of Chemistry, Thiagarajar College, Tamil Nadu, India-625009.

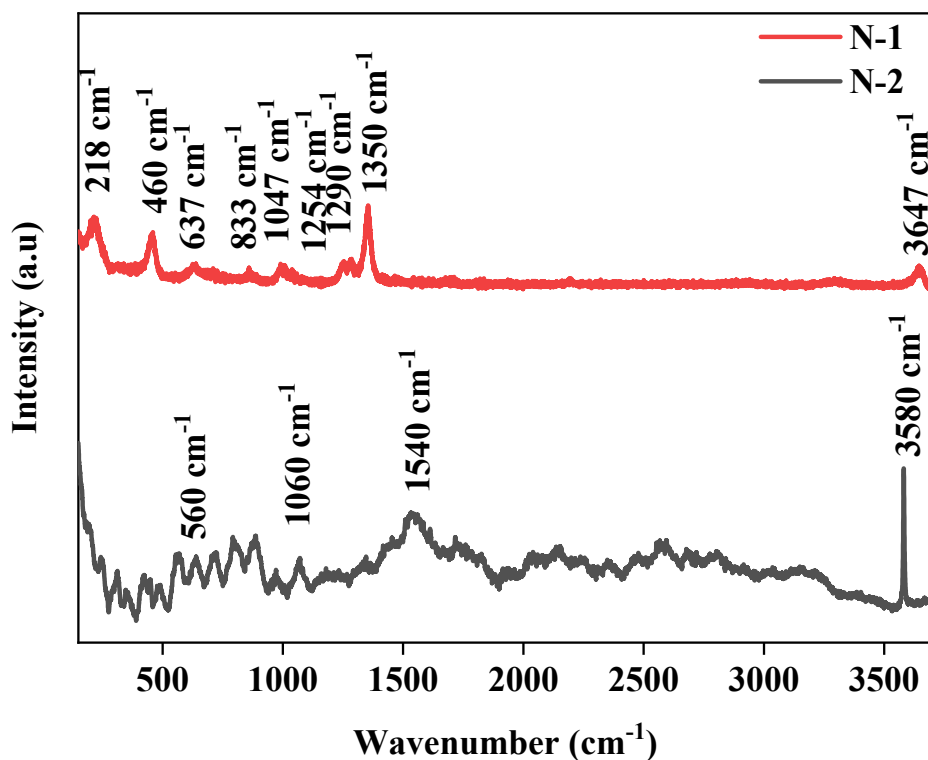

Fig S1. Raman Spectrum of alpha (N-1) and beta (N-2) nickel hydroxide

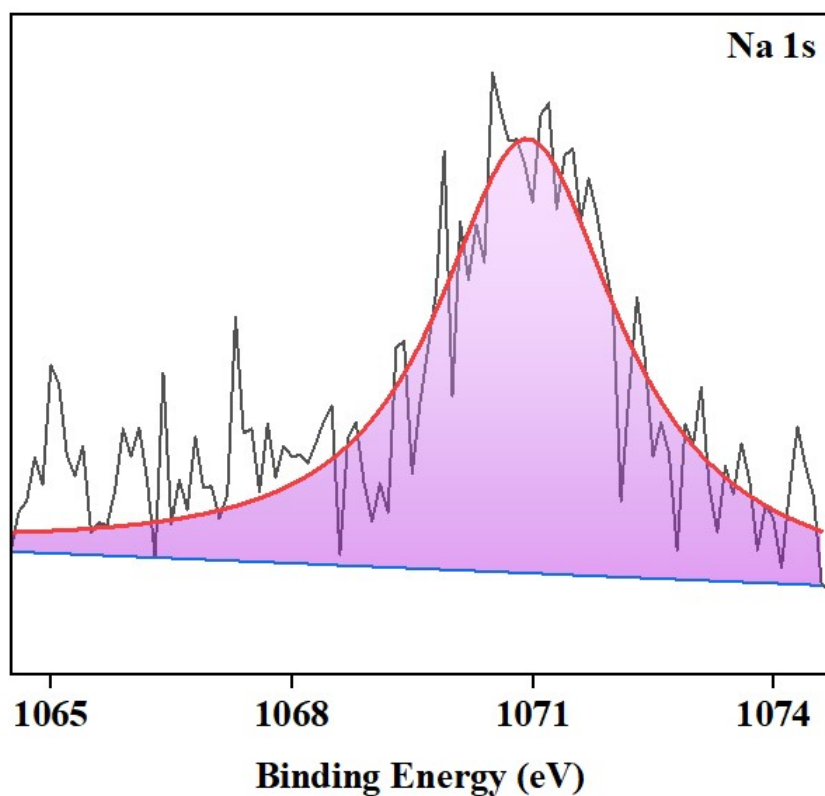

Fig S2 (A). XPS Spectrum of sodium in beta nickel hydroxide (N-2)

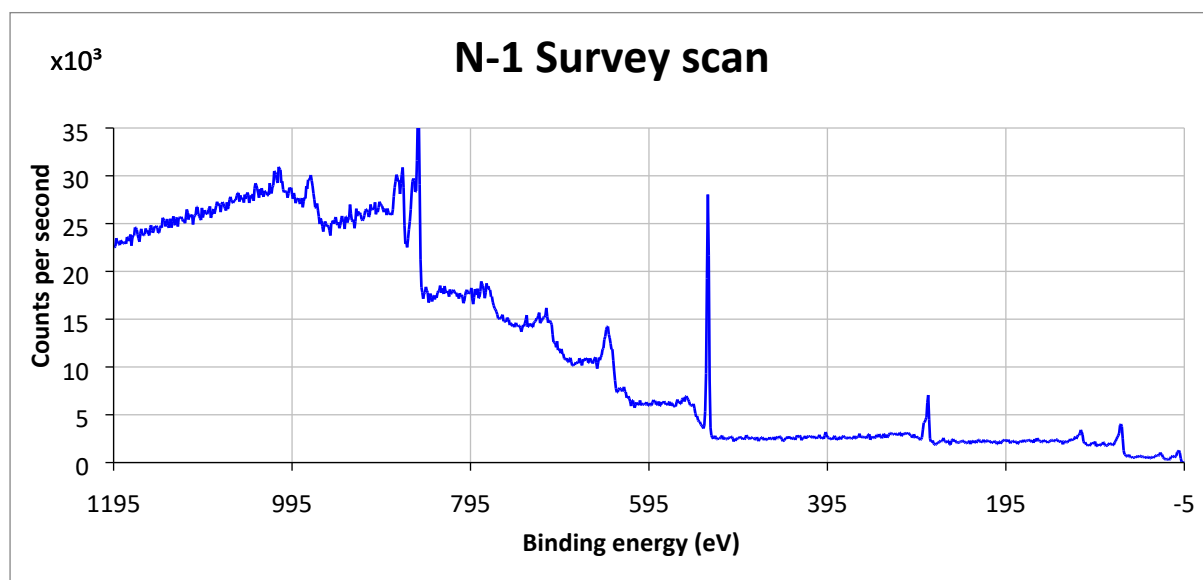

Fig S2 (B). XPS Spectrum of survey scan of N-1

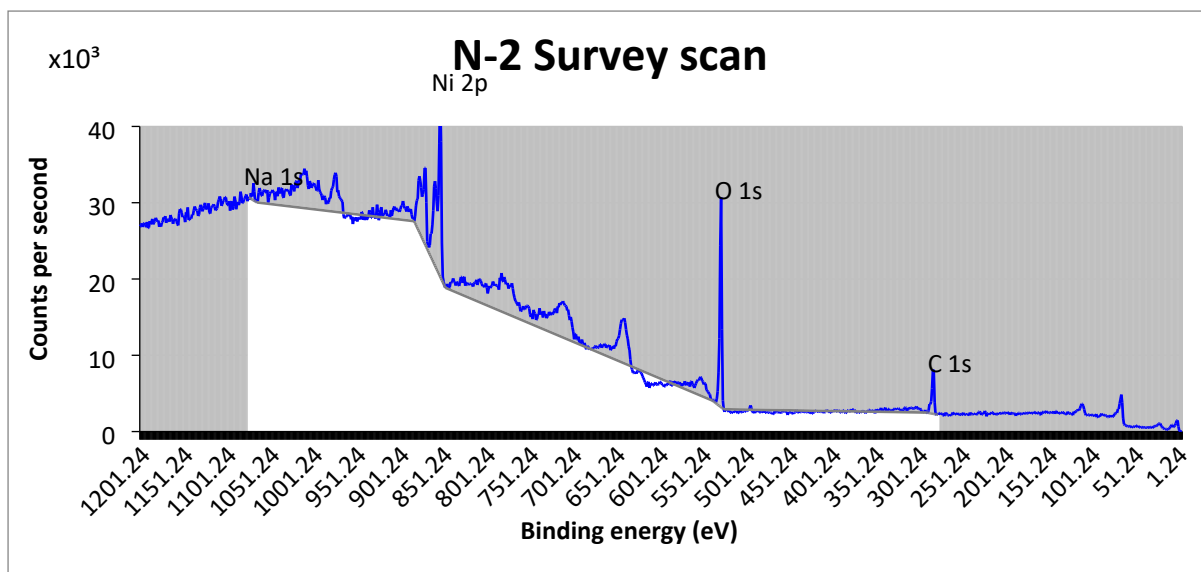

Fig S2 (C). XPS Spectrum survey scan of N-2

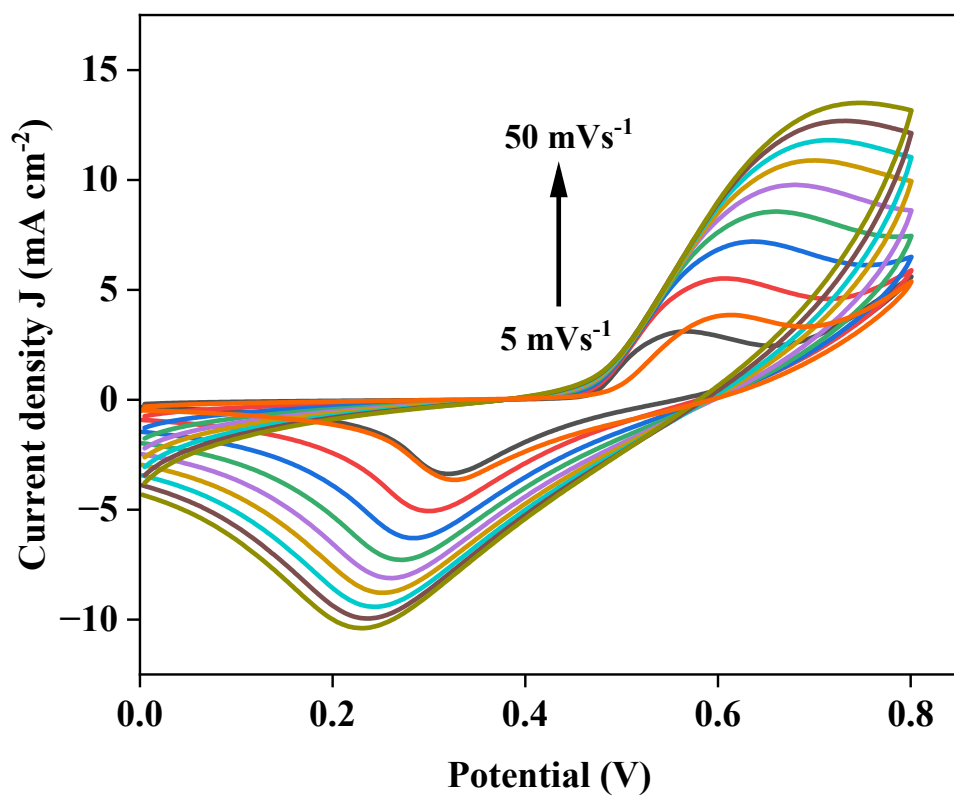

Fig S3. Scan rate variation of beta nickel hydroxide (N-2)

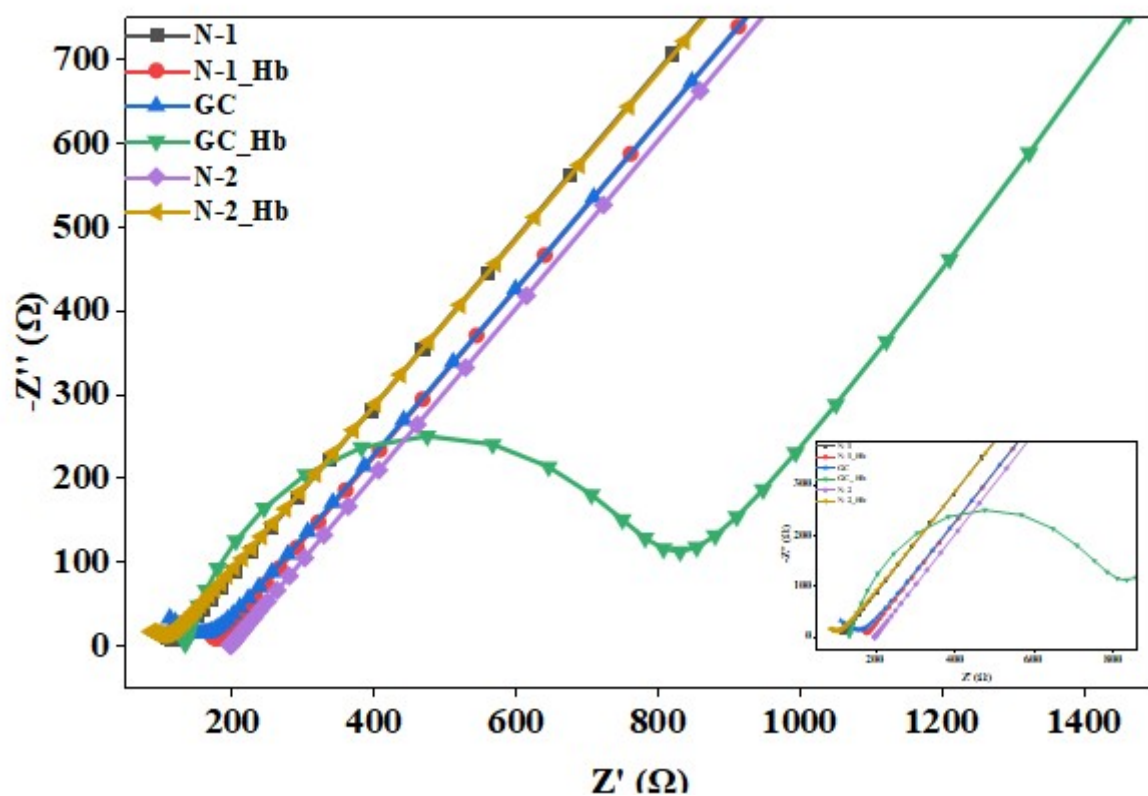

Fig S4. Nyquist plot of assynthesized catalyst

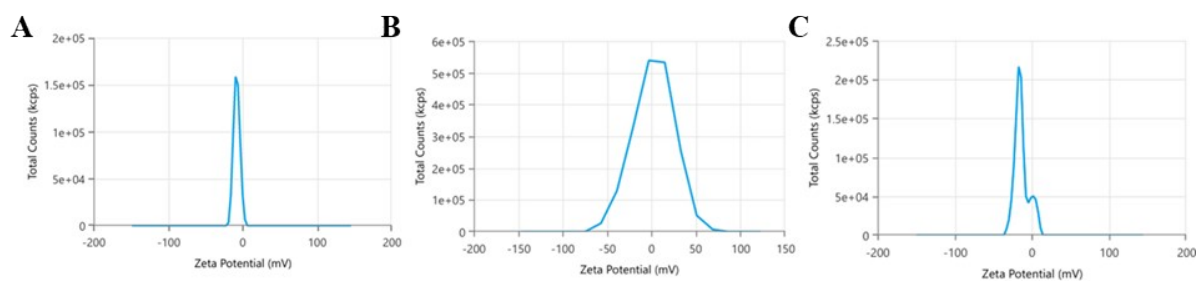

Fig S5 (A) Zeta Potential of alpha nickel hydroxide (N-1); (B) Zeta Potential of beta nickel hydroxide (N-2); (C) Zeta Potential of Haemoglobin

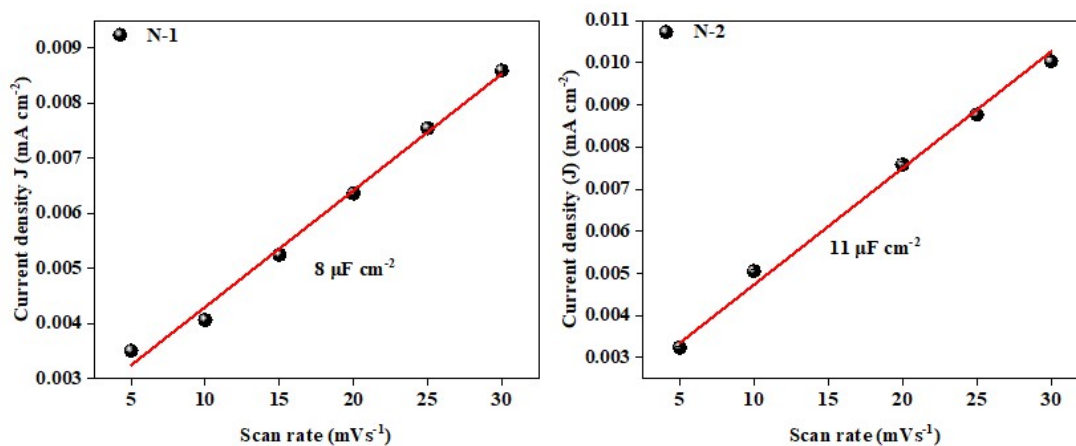

Fig S6 (A) Cdl of alpha nickel hydroxide (N-1); (B) Cdl of beta nickel hydroxide (N-2)

Table S1 Literature comparison of Hb sensing

| S. No | Material With Electrode   | Method                       | Linear range (μM) | Detection limit (nM) | Ref          |
|-------|---------------------------|------------------------------|-------------------|----------------------|--------------|
| 1.    | Ni (OH) <sub>2</sub> /GCE | DPV                          | 0.01 to 0.7       | 100                  | Present work |
| 2.    | MB-MWNTs                  | CV and FIA                   | 5 to 2            | 1.5                  | 52           |
| 3.    | NAC capped CdHgSe QDs     | Fluorometry                  | 4 to 0.44         | 2.0                  | 53           |
| 4.    | Au-EQCM/C/Fe@CNps         | Voltammetric detection       | -                 | 0.0007               | 54           |
| 5.    | TBO/pTBA@MWCNT            | Cyclic voltammetry           | 0.1 to 10         | 0.082                | 55           |
| 6.    | Fc-ECG/AuNPs/SPE          | Difference Pulse Voltammetry | 0.1 to 1000       | 30                   | 56           |
| 7.    | CS/MGCE                   | Difference Pulse Voltammetry | 0.05 to 50        | 10                   | 57           |
| 8.    | ZGC-PLNP                  | PL Spectra                   | 1 to 0.05         | 0.13                 | 58           |
| 9.    | TeNWs/GO-GCE              | Cyclic voltammetry           | -                 | 292                  | 59           |
| 10    | NiTe/GCE                  | Cyclic voltammetry           | 0.9 to 0.00002    | 0.012                | 60           |
